# Supplementary material
Source: PubMed Central journal article supplement (PMC6066321)
Supplement: supp_RA117.001211_134286_1_supp_137396_p8q3w5.pdf [file supp_RA117.001211_134286_1_supp_137396_p8q3w5.pdf]

## SUPPORTING INFORMATION

### **The Role of Twist1 in Mutant Huntingtin-Induced Transcriptional Alterations and Neurotoxicity**

Yanchun Pan, Ying Zhu, Wei Yang, Eric Tycksen, Shaopeng Liu, John Palucki, Linjian Zhu, Yo Sasaki, Mukesh K. Sharma, Albert H. Kim, Bo Zhang, and Hiroko Yano\*

\*Correspondence:

Email: [yanoh@wustl.edu](mailto:yanoh@wustl.edu)

#### **Contents**

**Supplementary Data 1** Differentially expressed genes in Htt-72Q-expressing primary cortical neurons vs. Htt-25Q-expressing neurons identified by RNA-seq analysis in Fig 1.

**Supplementary Data 2** GO analysis of differentially expressed genes in Htt-72Q-expressing primary cortical neurons vs. Htt-25Q-expressing neurons, related to Fig 1F,G.

**Supplementary Data 3** Genes differentially expressed in both the primary cortical neuron model and the cortex of R6/2 mouse model.

**Supplementary Data 4** Genes differentially expressed in both the primary cortical neuron model and human HD cortex.

**Supplementary Data 5** Lists of genes and interactions in the transcriptional regulatory network of mutant Htt-expressing cortical neurons in Fig 2.

**Supplementary Data 6** Twist1-dependent deregulated genes in mutant Htt-expressing primary cortical neurons identified by RNA-seq analysis in Fig 5.

**Supplementary Data 7** Twist1-dependent deregulated genes that harbor Twist-binding motif(s) in Fig 5E.

**Supplementary Data 8** Potential regulators of Twist1-dependent transcriptional repression in mutant Htt-expressing cortical neurons, related to Fig 5G.
